# Supplementary material for: Effects of camptothecin derivatives and topoisomerase dual inhibitors on Trypanosoma cruzi growth and ultrastructure
Source: PubMed Central journal article supplement (PMC4066697; doi:10.1186/1477-5751-13-11), 2014-06-10

## Cell Viability of *T. cruzi* Y with Luteolin

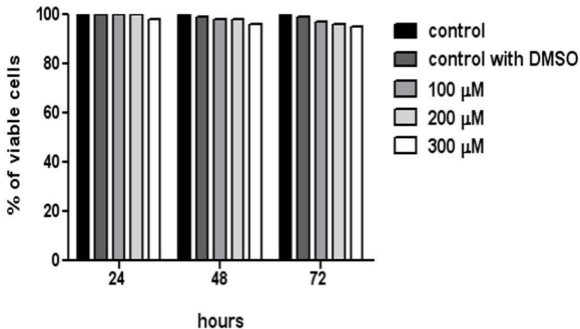

Supplement: 1477-5751-13-11-S2.pdf [file 1477-5751-13-11-S2.pdf]
